# Supplementary material for: Three-dimensional Organotypic Culture Models of Human Hepatocellular Carcinoma
Source: PubMed Central journal article supplement (PMC4754778; doi:10.1038/srep21174), 2016-02-16
Supplement: srep21174-s1.pdf [file srep21174-s1.pdf]

## Three-dimensional Organotypic Culture Models of Human Hepatocellular Carcinoma

Atsushi Takai<sup>1</sup>, Valerie Fako<sup>1</sup>, Hien Dang<sup>1</sup>, Marshonna Forgues<sup>1</sup>, Zhipeng Yu<sup>1</sup>, Anuradha Budhu<sup>1</sup>, Xin Wei Wang<sup>1,\*</sup>

<sup>1</sup>Laboratory of Human Carcinogenesis, Center for Cancer Research, National Cancer Institute, Bethesda, Maryland 20892, USA

\*Correspondence: Xin Wei Wang, National Cancer Institute, 37 Convent Drive, Building 37, Room 3044A, Bethesda, Maryland 20892; Email: xw3u@nih.gov; Phone: 301-496-2099

Running title: A three-dimensional organotypic cell culture model exemplifies molecular features of hepatocellular carcinoma

Supplementary information

## **Supplemental Figure legends**

Supplemental Figure 1. Representative images of Huh1 spheres cultured in each matrix examined. Black arrows point to examples of sphere fusion. Scale bars are 50 $\mu$ m.

Supplemental Figure 2. Representative images of spheres of various cell lines grown in AlgiMatrix. All the spheres were collected at Day 7 and stained with H&E. Scale bars are 50 $\mu$ m.

Supplemental Figure 3. Representative images of Huh-1 spheres with EpCAM shRNA. All the spheres were collected at Day 7 and stained with E-cadherin (green) and EpCAM (red). Scale bars are 50 $\mu$ m.

Supplemental Figure 4. Relative number of Huh1 spheres (white bars) and MHCC97-H spheres (black bars) treated with DMSO, AV-606 and fiduxosin are shown.

Supplemental Figure 5. Relative number of Huh1 spheres harvested at Day 7, treated with TGF $\beta$  beginning at Day 1 of AlgiMatrix culture, is shown.

# Supplemental Figure 1

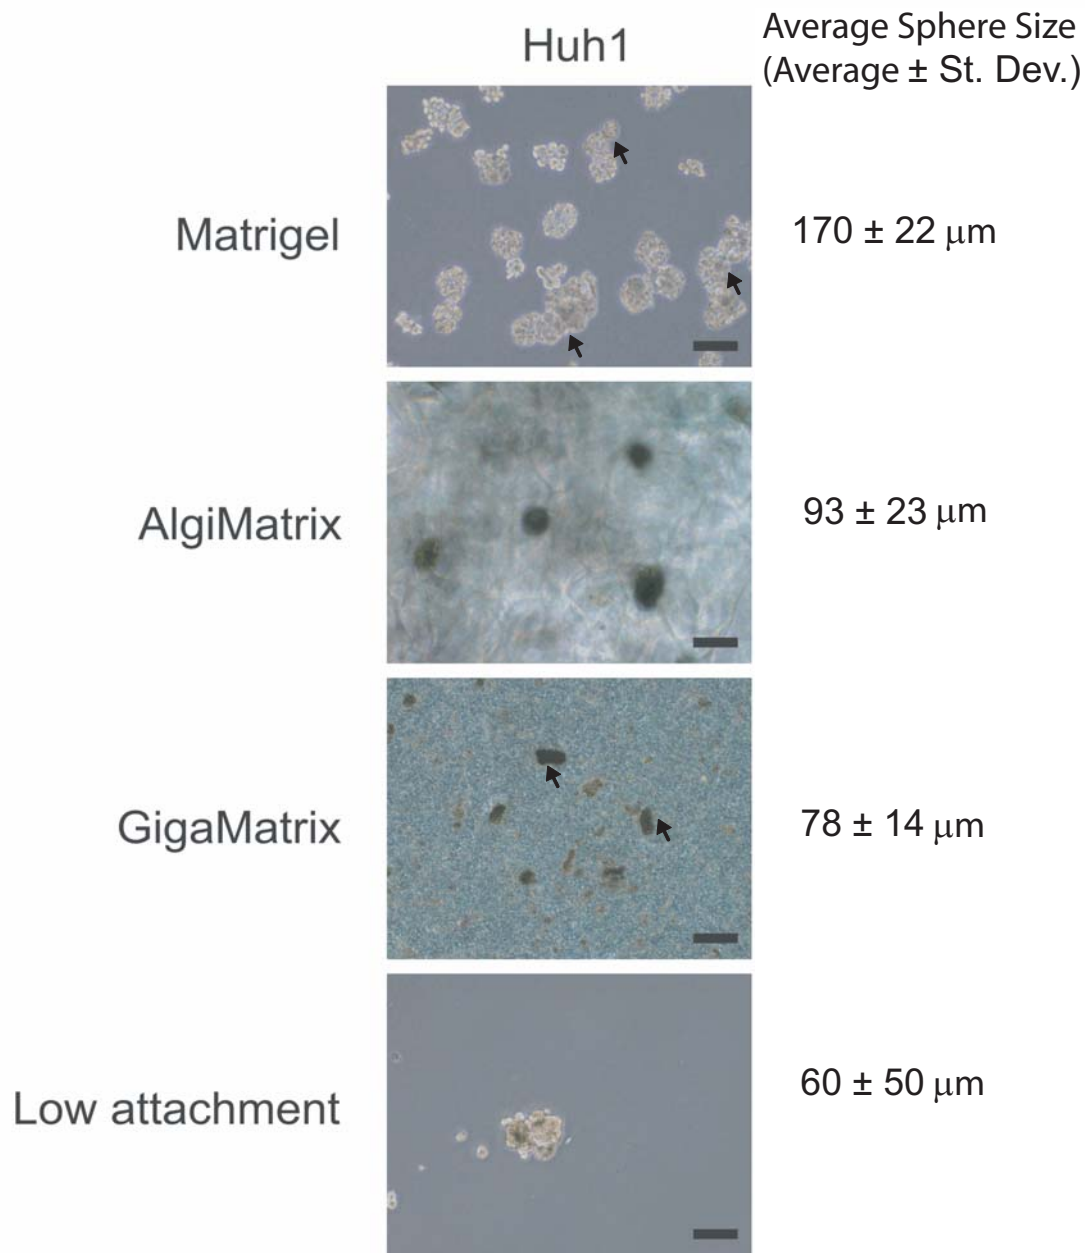

# Supplemental Figure 2

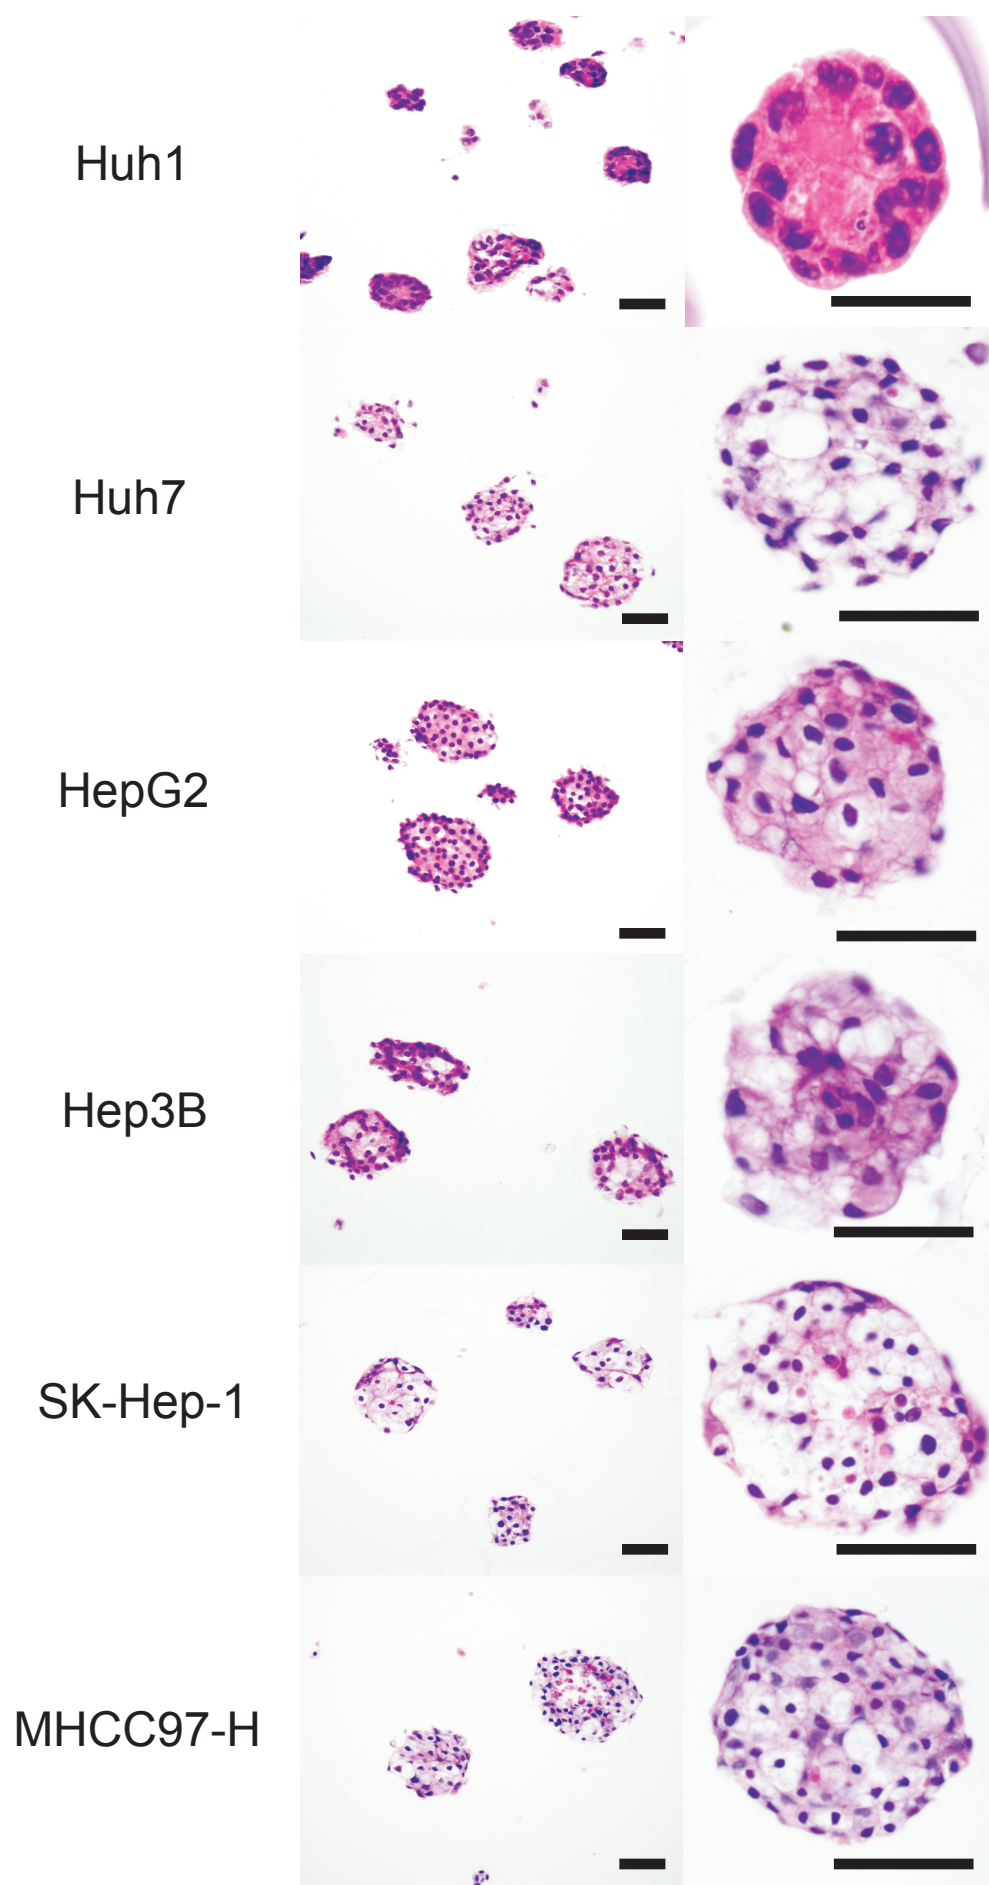

Supplemental Figure 3

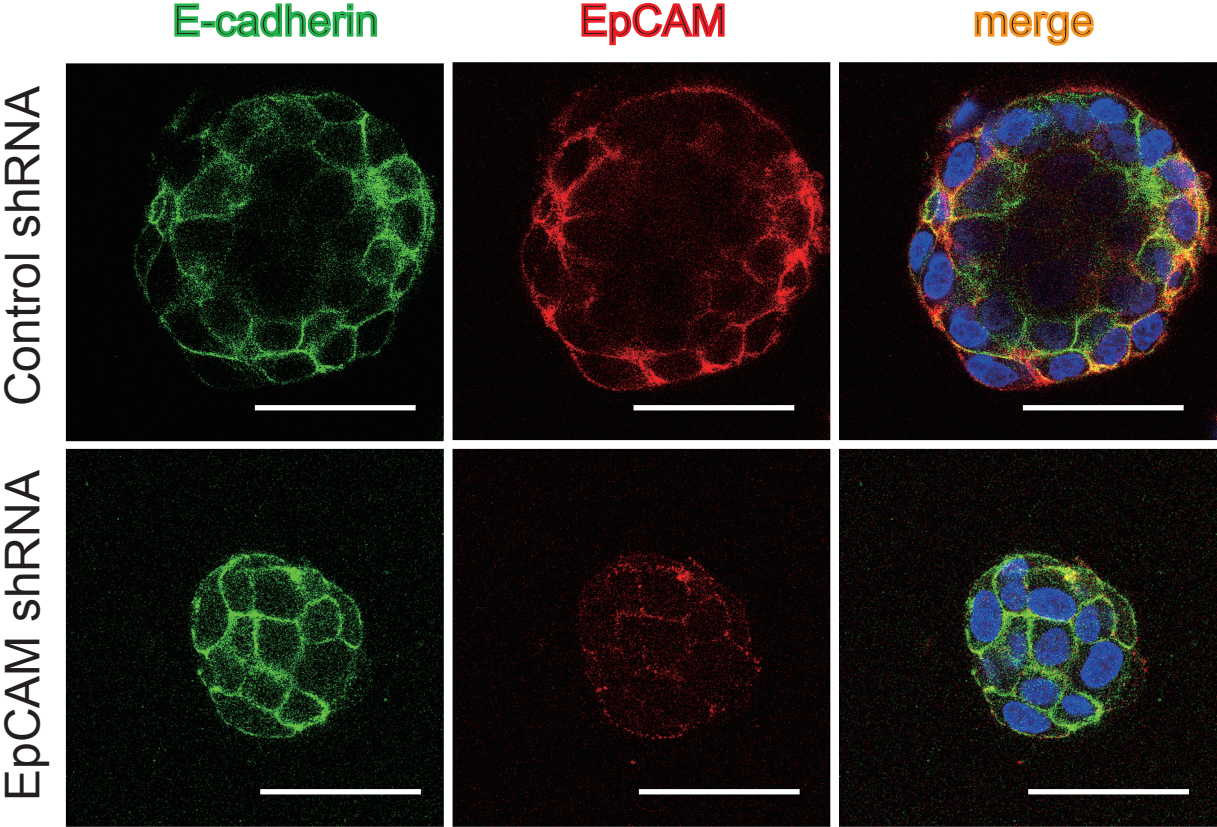

Supplemental Figure 4

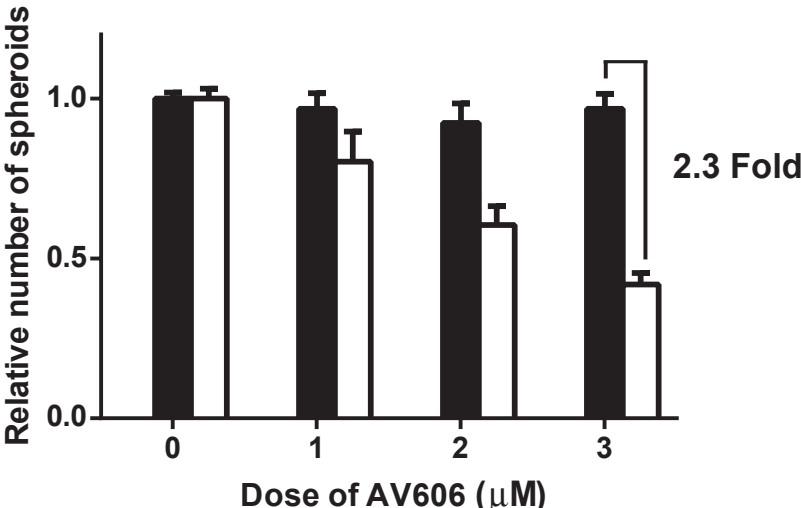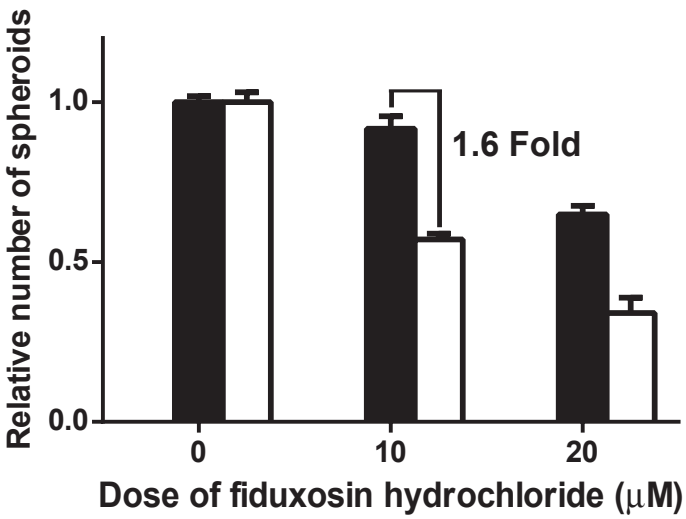

□ HUH1    ■ MHCC97

Supplemental Figure 5

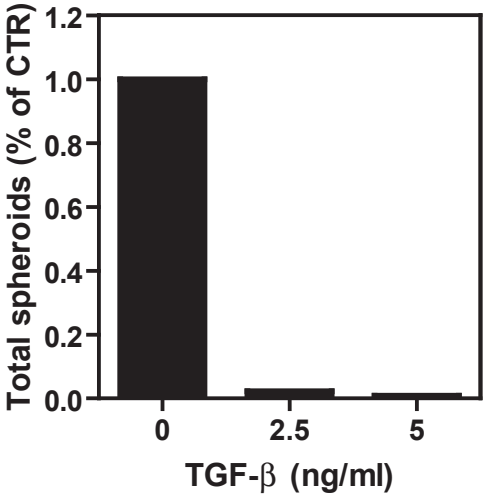

Supplemental Table 1. Summary of characteristics of each culture system

|                                 | <b>Size Range<br/>Observed</b> | <b>Morphology<br/>Observed</b> | <b>Sphere Fusion<br/>Observed</b> | <b>Ease in Sphere<br/>Collection</b> |
|---------------------------------|--------------------------------|--------------------------------|-----------------------------------|--------------------------------------|
| <b>AlgiMatrix</b>               | 60-240 $\mu\text{m}$           | Round                          | No                                | Easy                                 |
| <b>Matrigel</b>                 | 50-200 $\mu\text{m}$           | Round/Irregular                | Yes                               | Easy                                 |
| <b>GigaMatrix</b>               | 50-125 $\mu\text{m}$           | Irregular                      | Yes                               | Difficult                            |
| <b>Ultra-Low<br/>Attachment</b> | 20-300 $\mu\text{m}$           | Round                          | No                                | Easy                                 |



Supplemental Table 2. Frequencies of HCC and metastasis in orthotopic liver cancer model

|                                        | <b>No treatment (3D)<br/>(n=9)</b> | <b>TGF treatment<br/>(3D) (n=10)</b> | <b>No treatment<br/>(2D) (n=9)</b> | <b>TGF treatment<br/>(2D) (n=7)</b> |
|----------------------------------------|------------------------------------|--------------------------------------|------------------------------------|-------------------------------------|
| <b>Number of mice<br/>with HCC (%)</b> | 8 (89)                             | 9 (90)                               | 6 (67)                             | 6 (86)                              |
| <b>Peritoneal<br/>metastasis (%)</b>   | 0 (0)                              | 1 (10)                               | 0 (0)                              | 0 (0)                               |
| <b>Diaphragm<br/>metastasis (%)</b>    | 0 (0)                              | 1 (10)                               | 0 (0)                              | 0 (0)                               |
